# Supplementary material for: A novel imaging method for correlating 2D light microscopic data and 3D volume data based on block-face imaging
Source: PubMed Central journal article supplement (PMC5473845; doi:10.1038/s41598-017-03900-9), 2017-06-16
Supplement: 41598_2017_3900_MOESM1_ESM.pdf [file 41598_2017_3900_MOESM1_ESM.pdf]

# A novel imaging method for correlating 2D light microscopic data and 3D volume data based on block-face imaging

Yuki Tajika\*, Tohru Murakami, Keiya Iijima, Hiroki Gotoh, Maiko Takahashi-Ikezawa, Hitoshi Ueno, Yuhei Yoshimoto, Hiroshi Yorifuji

## PDF file

**Supplementary Table S1** | List of components used in the CoMBI system and approximate costs.

**Supplementary Figure S1** | Installation of the CoMBI system

**Supplementary Figure S2** | Controller

**Supplementary Figure S3** | Sensor

**Supplementary Figure S4** | Illumination, cleaning brush, and covers

**Supplementary Figure S5** | Procedure for making the frozen blocks with a right cylindrical shape and black background

**Supplementary Figure S6** | Drawings for self-made devices

**Supplementary Figure S7** | Procedure for image processing

**Supplementary Note** | Codes for releasing the camera shutter and regulating the cleaning brush

## MOV files

**Supplementary Video S1** | Imaging the block-face serially

**Supplementary Video S2** | 3D reconstruction from the serial block-face images

**Supplementary Video S3** | Collecting a section while pausing the block-face imaging

**Supplementary Video S4** | Cleaning the block throughout imaging

**Supplementary Video S5** | Image registration

Supplementary Table S1 | List of components used in the CoMBI system and approximate costs.

| Categories                                  | Parts                                                          | Part#                                             | Manufacturers                                            | Vendors                                         | Unit prices JPY | Quantities | Amounts JPY     | Amounts US\$        | Sub total US\$ |  |
|---------------------------------------------|----------------------------------------------------------------|---------------------------------------------------|----------------------------------------------------------|-------------------------------------------------|-----------------|------------|-----------------|---------------------|----------------|--|
| Essential electronic components             | Microcontroller                                                | ATtiny85                                          | Atmel, San Jose, CA, USA                                 | Marutsu                                         | 215             | 2          | 430             | \$4.22              |                |  |
|                                             | Photointerrupter                                               | RPR-220                                           | Rohm, Kyoto, Japan                                       | Sengoku                                         | 137             | 1          | 137             | \$1.34              |                |  |
|                                             | Optocoupler                                                    | TLP785(GB)                                        | Toshiba, Minato, Tokyo, Japan                            | Akizuki                                         | 20              | 1          | 20              | \$0.20              |                |  |
|                                             | LED with bracket                                               | DB9TCHR                                           | Sato Paris, Shibuya, Tokyo, Japan                        | Marutsu                                         | 140             | 1          | 140             | \$1.37              |                |  |
|                                             | DC-DC converter                                                | R-78E5.0-0.5                                      | RECOCOM, Gmunden, Austria                                | Akizuki                                         | 350             | 1          | 350             | \$3.43              |                |  |
|                                             | Stacked ceramic capacitor                                      | 10JF-25V                                          | Murata Manufacturing, Nagakakyō, Kyoto, Japan            | Akizuki                                         | 30              | 2          | 60              | \$0.59              |                |  |
|                                             | Resistor 220, 10k                                              | PU45x64                                           | (No brand)                                               | RS Components                                   | 242             | 1          | 4               | \$0.04              |                |  |
|                                             | Universal board                                                | Hanuhime                                          | Daiso Electronics Industrial, Osaka, Japan               | Sengoku                                         | 100             | 1          | 242             | \$2.37              |                |  |
|                                             | Cheek brush                                                    | SG2R                                              | Daiso, Higashi-Hiroshima, Hiroshima, Japan               | Daiso                                           | 100             | 1          | 100             | \$0.98              |                |  |
|                                             | Micro servo motor                                              | OSLA03X3W00                                       | Tower Pro, Taiwan                                        | Akizuki                                         | 500             | 1          | 500             | \$4.90              |                |  |
|                                             | LED lamp                                                       | NP12-1S1210                                       | OptoSupply, Fo Tan, N.T., Hong Kong                      | Akizuki                                         | 900             | 2          | 1800            | \$1.65              |                |  |
|                                             | Switching AC adaptor 12V-1A                                    | NP12-1S1210                                       | Go Forward Enterprise, Taichung, Taiwan                  | Akizuki                                         | 750             | 1          | 750             | \$7.35              |                |  |
|                                             | Panel mount components                                         | DC jack 2.1 mm                                    | MJ-21                                                    | Marushin Electric, Kawasaki, Kanagawa, Japan    | Marutsu         | 200        | 2               | 400                 | \$3.92         |  |
|                                             |                                                                | DC plug 2.1 mm                                    | MP121C                                                   | Marushin Electric, Kawasaki, Kanagawa, Japan    | Akizuki         | 60         | 1               | 60                  | \$0.59         |  |
|                                             |                                                                | 3.5 mm stereo plug, 4-pins                        | 435-IT                                                   | Comon, Saitama, Saitama, Japan                  | Sengoku         | 125        | 1               | 125                 | \$1.23         |  |
|                                             |                                                                | 3.5 mm stereo panel mount jack, 4-pins            | MJ-079                                                   | Marushin Electric, Kawasaki, Kanagawa, Japan    | Sengoku         | 163        | 1               | 163                 | \$1.60         |  |
|                                             |                                                                | 2.5 mm stereo plug, 3-pins                        | MP-025MH                                                 | Marushin Electric, Kawasaki, Kanagawa, Japan    | Sengoku         | 115        | 1               | 115                 | \$1.13         |  |
|                                             |                                                                | 2.5 mm stereo panel mount jack, 3-pins            | MJ-070                                                   | Marushin Electric, Kawasaki, Kanagawa, Japan    | Sengoku         | 105        | 1               | 105                 | \$1.03         |  |
|                                             |                                                                | Toggle switch, maintained                         | MS500AB                                                  | Miyama Electric, Ohta, Tokyo, Japan             | Marutsu         | 204        | 4               | 816                 | \$8.00         |  |
|                                             |                                                                | Toggle switch, momentary                          | MS-500B-B                                                | Miyama Electric, Ohta, Tokyo, Japan             | Marutsu         | 179        | 1               | 179                 | \$1.75         |  |
|                                             |                                                                | Binding post                                      | MB-126G                                                  | Avicon, Tainan, Taiwan                          | Akizuki         | 150        | 3               | 450                 | \$4.41         |  |
|                                             |                                                                | Rocker switch                                     | Fujisoku SLE210K-9                                       | Nidec Copal Electronics, Shinjuku, Tokyo, Japan | Marutsu         | 180        | 1               | 180                 | \$1.76         |  |
|                                             | Wiring components                                              | IC socket 6P                                      | (No brand)                                               | (No brand)                                      | Marutsu         | 74         | 2               | 148                 | \$0.15         |  |
|                                             |                                                                | IC socket 8P                                      | (No brand)                                               | (No brand)                                      | Akizuki         | 10         | 1               | 10                  | \$0.10         |  |
|                                             |                                                                | XH connector contact                              | SXH-001T-0.6                                             | J.S.T.MFG. Osaka, Japan                         | Marutsu         | 10         | 26              | 260                 | \$2.55         |  |
|                                             |                                                                | XH connector housing 2P                           | XHP-2                                                    | J.S.T.MFG. Osaka, Japan                         | Marutsu         | 22         | 9               | 198                 | \$1.94         |  |
|                                             |                                                                | XH connector housing 3P                           | XHP-3                                                    | J.S.T.MFG. Osaka, Japan                         | Marutsu         | 26         | 2               | 52                  | \$0.51         |  |
| XH connector housing 4P                     |                                                                | XHP-4                                             | J.S.T.MFG. Osaka, Japan                                  | Marutsu                                         | 30              | 1          | 30              | \$0.29              |                |  |
| XH connector shrouded header, top entry, 2P |                                                                | B2B-XH-A                                          | J.S.T.MFG. Osaka, Japan                                  | Marutsu                                         | 23              | 9          | 207             | \$2.03              |                |  |
| XH connector shrouded header, top entry, 3P |                                                                | B3B-XH-A                                          | J.S.T.MFG. Osaka, Japan                                  | Marutsu                                         | 24              | 2          | 48              | \$0.47              |                |  |
| XH connector shrouded header, top entry, 4P |                                                                | B4B-XH-A                                          | J.S.T.MFG. Osaka, Japan                                  | Marutsu                                         | 32              | 1          | 32              | \$0.31              |                |  |
| Slim robot cable 2P, 3m                     |                                                                | KRT AWG28x2C                                      | Kyowa Harmonet, Fushimi, Kyoto, Japan                    | Sengoku                                         | 330             | 0.2        | 66              | \$0.65              |                |  |
| Slim robot cable 3P, 3m                     | KRT AWG28x3C                                                   | Kyowa Harmonet, Fushimi, Kyoto, Japan             | Sengoku                                                  | 420                                             | 0.2             | 84         | \$0.82          |                     |                |  |
| Slim robot cable 4P, 3m                     | KRT AWG28x4C                                                   | Kyowa Harmonet, Fushimi, Kyoto, Japan             | Sengoku                                                  | 490                                             | 0.2             | 98         | \$0.96          |                     |                |  |
| polyvinyl chloride wire, 0.2SQ, 10 m        | AVRB0 2SQ Black/Red                                            | (No brand)                                        | (No brand)                                               | 280                                             | 0.05            | 14         | \$0.14          |                     |                |  |
| Tin coating copper wire                     | TCW 0.6mm 10m                                                  | Kyowa Harmonet, Fushimi, Kyoto, Japan             | Akizuki                                                  | 210                                             | 0.01            | 2.1        | \$0.02          |                     |                |  |
| Plastic components                          | M3 screw, 10 mm                                                | M3X10polybis                                      | Nejino-Takayama, Katsushika, Tokyo, Japan                | Marutsu                                         | 1.2             | 33         | 39.6            | \$0.39              |                |  |
|                                             | M3 nut                                                         | M3polynut                                         | Nejino-Takayama, Katsushika, Tokyo, Japan                | Marutsu                                         | 16              | 16         | 256             | \$2.51              |                |  |
|                                             | M3 screw, countersunk head, 12 mm                              | GB-PFHS-M312-100P                                 | Linkman, Fukui, Fukui, Japan                             | Marutsu                                         | 3.8             | 6          | 22.8            | \$0.22              |                |  |
|                                             | Spacer with M3 female thread, 30 mm                            | AS-330B                                           | Hirosugi-Keiki, Kawasaki, Kanagawa, Japan                | Sengoku                                         | 53              | 8          | 424             | \$4.16              |                |  |
|                                             | Spacer with M3 female thread, 12 mm                            | DS312                                             | Takachi Electronics Enclosure, Kawaguchi, Saitama, Japan | Marutsu                                         | 15              | 2          | 30              | \$0.29              |                |  |
|                                             | Spacer, M3, 3mm                                                | C-303                                             | Hirosugi-Keiki, Kawasaki, Kanagawa, Japan                | Marutsu                                         | 15              | 8          | 120             | \$1.18              |                |  |
|                                             | Acrylic plate, black, 320*550*2.0mm                            | EX502S2                                           | Acrysunday, Shinjuku, Tokyo, Japan                       | Marutsu                                         | 1309            | 0.2        | 261.8           | \$2.57              |                |  |
|                                             | Acrylic plate, clear, 320*550*2.0mm                            | EX001S2                                           | Acrysunday, Shinjuku, Tokyo, Japan                       | Marutsu                                         | 1182            | 1          | 1182            | \$11.59             |                |  |
|                                             | Acrylic plate, milky white translucent, 320*550*2.0mm          | EX432S2                                           | Acrysunday, Shinjuku, Tokyo, Japan                       | Marutsu                                         | 1241            | 1          | 1241            | \$12.17             |                |  |
|                                             | Neodymium magnet with countersunk screw hole, 10*3 mm, rounded | (No brand)                                        | (No brand)                                               | (No brand)                                      | 189             | 4          | 756             | \$7.41              |                |  |
| 10*5mm clear adhere rubber feet Pad         | (No brand)                                                     | (No brand)                                        | (No brand)                                               | 10                                              | 2               | 20         | \$0.20          | \$123.48            |                |  |
| <b>Commercially available devices</b>       |                                                                |                                                   |                                                          |                                                 |                 |            |                 |                     |                |  |
| Sectioning                                  | Cryostat                                                       | CM5050S                                           | Leica Microsystems K.K., Tokyo, Japan                    |                                                 | 6162700         | 1          | 6162700         | \$60,418.63         | \$60,418.63    |  |
|                                             | Digital single lens reflex camera                              | D810                                              | Nikon, Tokyo, Japan                                      |                                                 | 344844          | 1          | 344844          | \$3,380.82          |                |  |
|                                             | Lens                                                           | SP AF 180mm F/3.5 Di LD [IF] MACRO 1:1 #410       | Tamron, Saitama, Japan                                   |                                                 | 72144           | 1          | 72144           | \$707.29            |                |  |
|                                             | Gearhead                                                       | #1033                                             | Manifrotto Distribution K.K., Tokyo, Japan               |                                                 | 26000           | 1          | 26000           | \$254.90            |                |  |
|                                             | Tripod                                                         | Husky #1003, Toyo Trading, Kyoto, Japan           |                                                          | 43600                                           | 1               | 43600      | \$427.45        |                     |                |  |
|                                             | Remote code                                                    | MC-22A                                            | Nikon, Tokyo, Japan                                      |                                                 | 3110            | 1          | 3110            | \$30.49             |                |  |
|                                             | Power connector                                                | EP-5B                                             | Nikon, Tokyo, Japan                                      |                                                 | 2484            | 1          | 2484            | \$24.35             |                |  |
|                                             | AC adaptor                                                     | EH-5B                                             | Nikon, Tokyo, Japan                                      |                                                 | 9936            | 1          | 9936            | \$97.41             | \$4,922.73     |  |
|                                             | Apple iMac                                                     | 27-inch, Late 2012                                | Apple Japan, Tokyo, Japan                                |                                                 | 252098          | 1          | 252098          | \$2,471.55          | \$2,471.55     |  |
|                                             | Light microscope                                               | AZ-100 (3-revolver, 3-fluorochrome set)           | Nikon, Tokyo, Japan                                      |                                                 | 3628000         | 1          | 3628000         | \$35,549.02         |                |  |
| Fluorescent imaging                         | SPOT RT3 (including software)                                  | Diagnostic Instruments, Sterling Heights, MI, USA |                                                          | 1200000                                         | 1               | 1200000    | \$11,764.71     | \$47,313.73         |                |  |
| <b>Total</b>                                |                                                                |                                                   |                                                          |                                                 |                 |            | <b>11755511</b> | <b>\$115,250.11</b> |                |  |
| Rate: \$1=¥102 (15 Sep. 2016)               |                                                                |                                                   |                                                          |                                                 |                 |            |                 |                     |                |  |

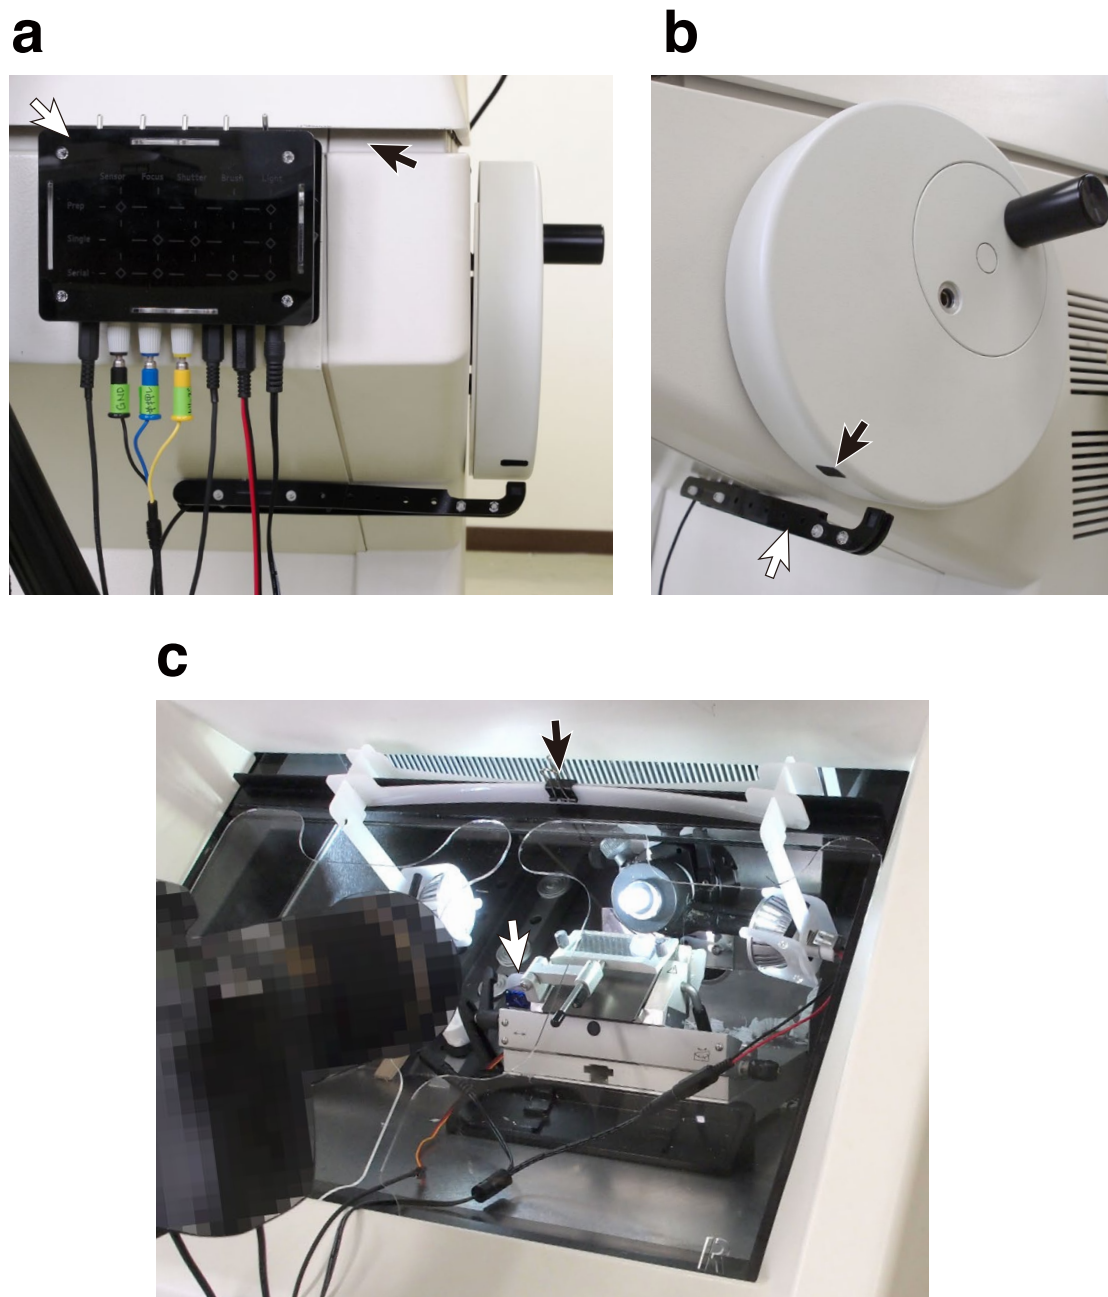

**Supplementary Figure S1** | Installation of the CoMBI system. a: The controller (white arrow) is attached to the front panel of the cryostat by magnets. The plate-like projection, which is hooked to the groove (black arrow), contributes to stability of the attachment. b: The sensor (white arrow) is attached close to the handle. A light-absorbing sheet is attached to the handle (black arrow). c: The illumination is fixed using plastic plates and a clip (black arrow), and illuminates the block-face orthogonally. The cleaning brush is attached to the back of the knife holder (white arrow), and cleans the block throughout imaging. Covers are used to stabilize the chamber temperature and avoid fogging.

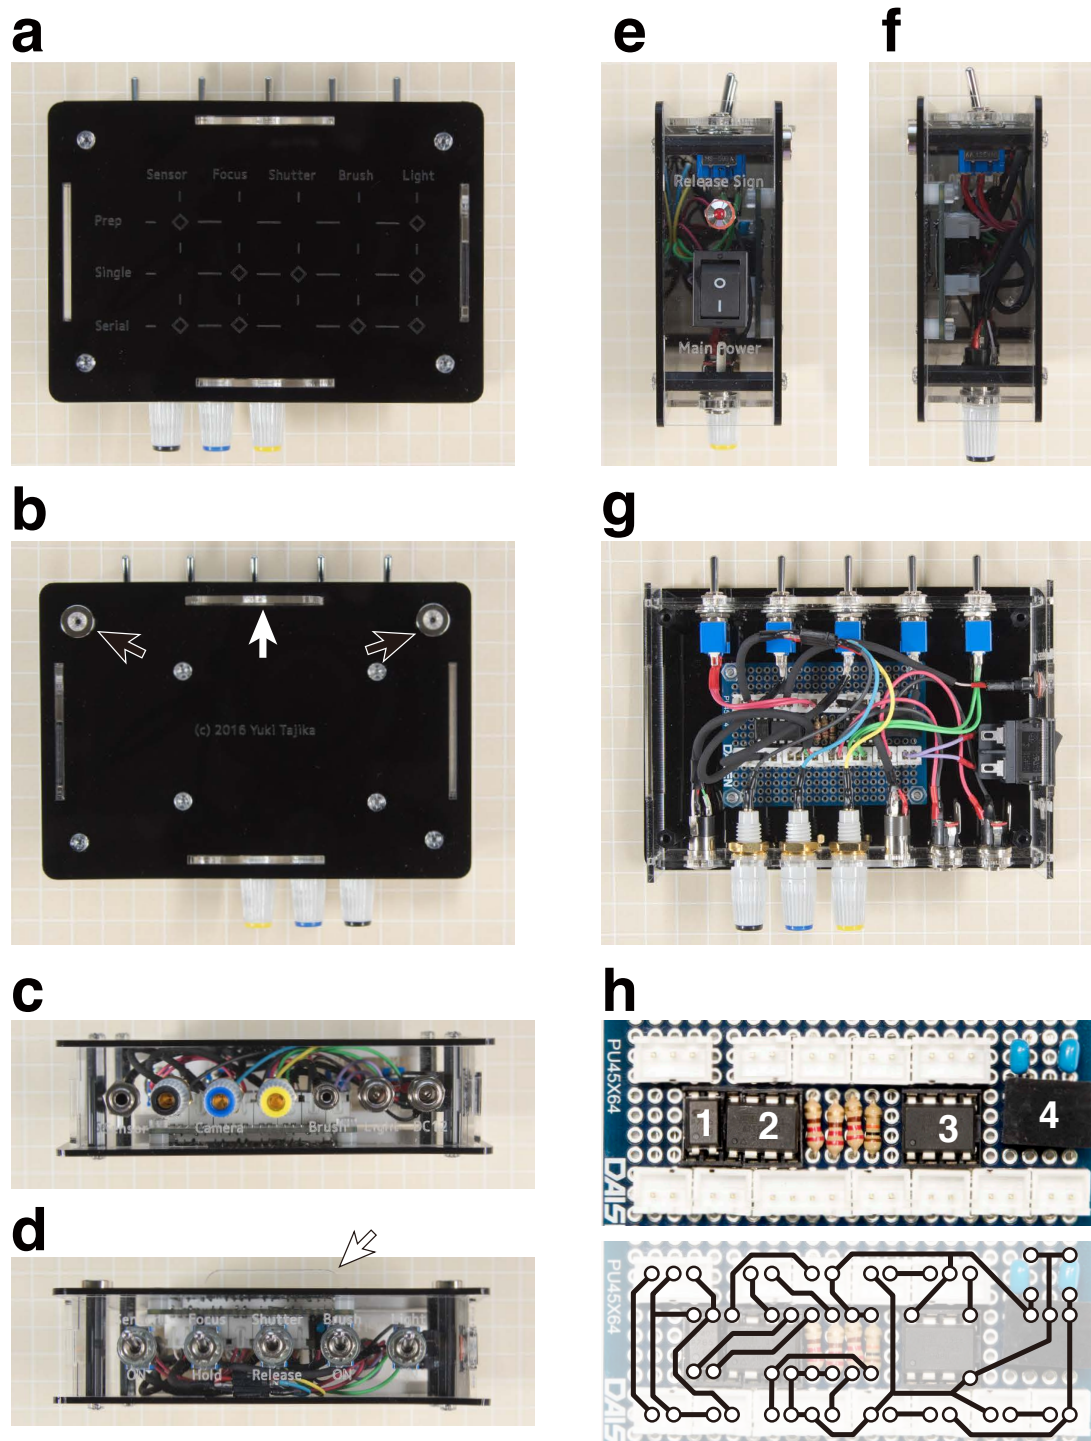

**Supplementary Figure S2** | Controller. a: Schematic instructions are shown on the front panel. b: The controller is fixed to the cryostat with two magnets (black arrows in b), and the plate-like projection is hooked to the groove (white arrows in b and d). c: The jacks at the bottom connect the sensor, camera, cleaning brush, illumination, and 12 V power supply. d: Toggle switches are used to switch the sensor, brush, and illumination, and to control camera focus and shutter release. e: The LED at the right side of the panel indicates the timing of shutter release. The rocker switch is the main power switch. f: There is no function on the left side. g: The internal appearance of the controller is shown. The jacks and switches are connected to the main board. h: The main board consists of an optocoupler (1), a microcontroller for regulating the shutter release (2), a microcontroller for regulating the cleaning brush (3), a DC/DC converter for converting 12 V to 5 V (4), resistors, capacitors, and connectors, which are soldered and wired as illustrated at the bottom. Square pattern: 1 cm.



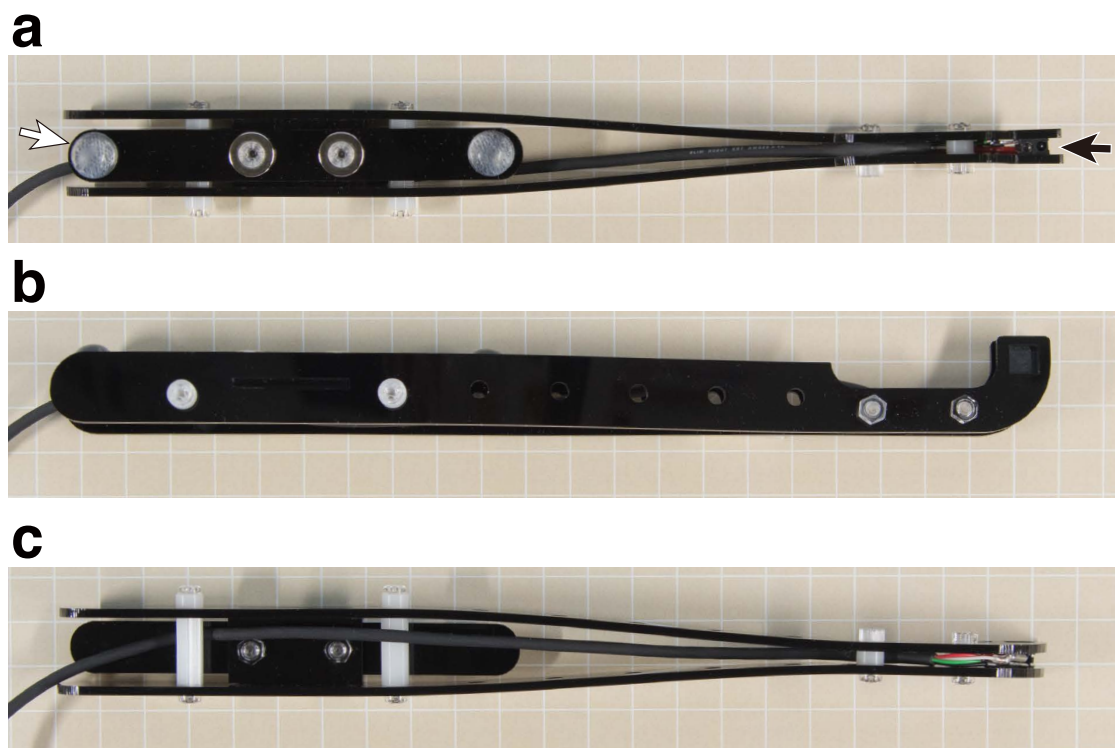

**Supplementary Figure S3 | Sensor.** a: The top view of the sensor is shown. A photoreflexor is fixed between the plastic frames (black arrow). The sensor is attached stably to the cryostat by magnets at the central part of the plate spring, which presses silicone pads to the cryostat (white arrow). The sensor detects light reflection from the handle surface, and sends the analog value to the microcontroller. Changes in value at the light-absorbing sheet on the handle trigger camera shutter release. b, c: Side and bottom views of the sensor are shown. Square pattern: 1 cm.

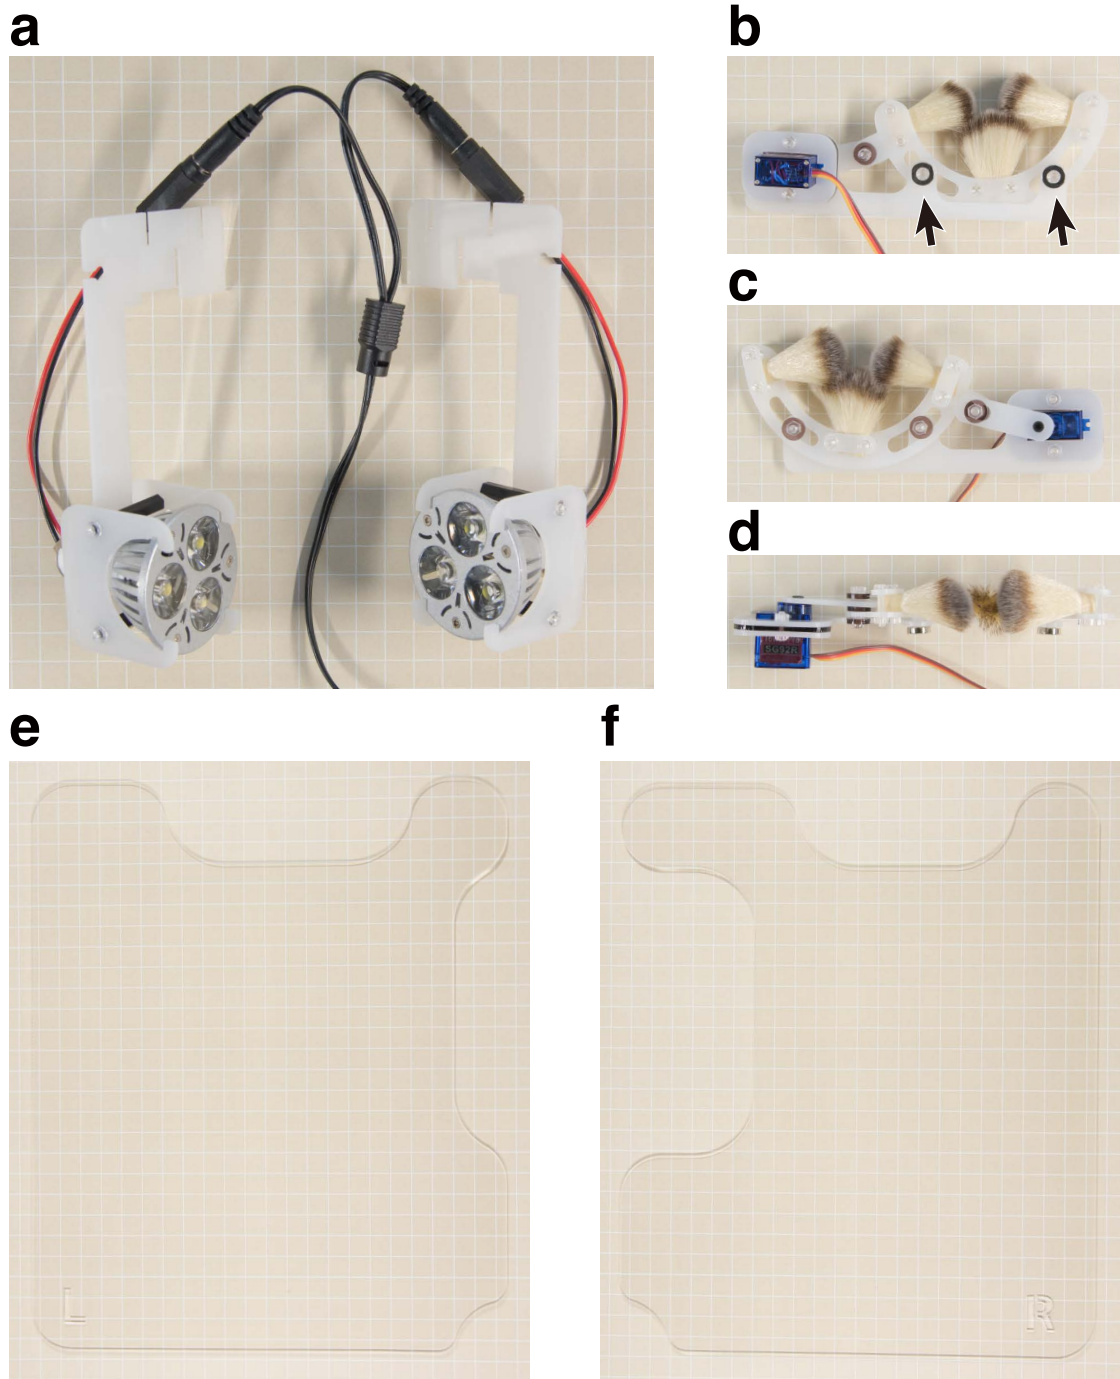

**Supplementary Figure S4** | Illumination, cleaning brush, and covers. a: The illumination consists of two LED lamps. The frames were made of white acrylic plates, which do not affect the color valance of the illumination. b – d: The cleaning brush consists of three brushes and a servomotor, and is attached to the back of the knife holder by magnets (black arrows). e, f: Covers are used to stabilize the chamber temperature and avoid fogging. The cover has hollows for imaging the block-face, and inserting the illuminating device and the wire of the cleaning brush. The clear acrylic plate allows checking of the condition of the block-face during imaging. Square pattern: 1 cm.

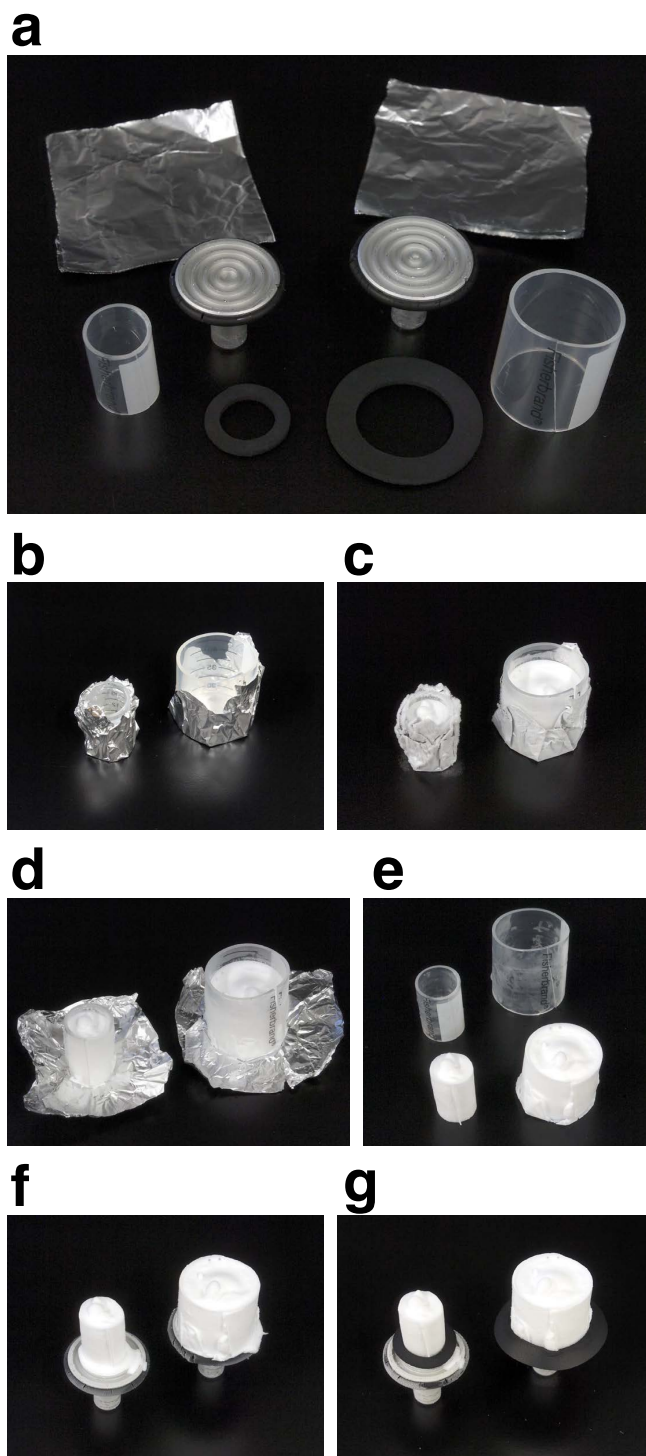

**Supplementary Figure S5** | Procedure for making the frozen blocks with a right cylindrical shape and black background. a: Pieces of 15-ml or 50-ml plastic tube 25 mm in height, aluminum foil, black rubber rings, and specimen holders are used to make frozen blocks. The plastic tubes are cut open at one portion. b: The cups are made using plastic tubes and aluminum foil. c: The blocks are quickly frozen in liquid nitrogen. d, e: Aluminum foil and plastic tubes are removed. f: The frozen blocks are attached to the specimen holder. g: The black rubber rings are installed at the bottom of the block.

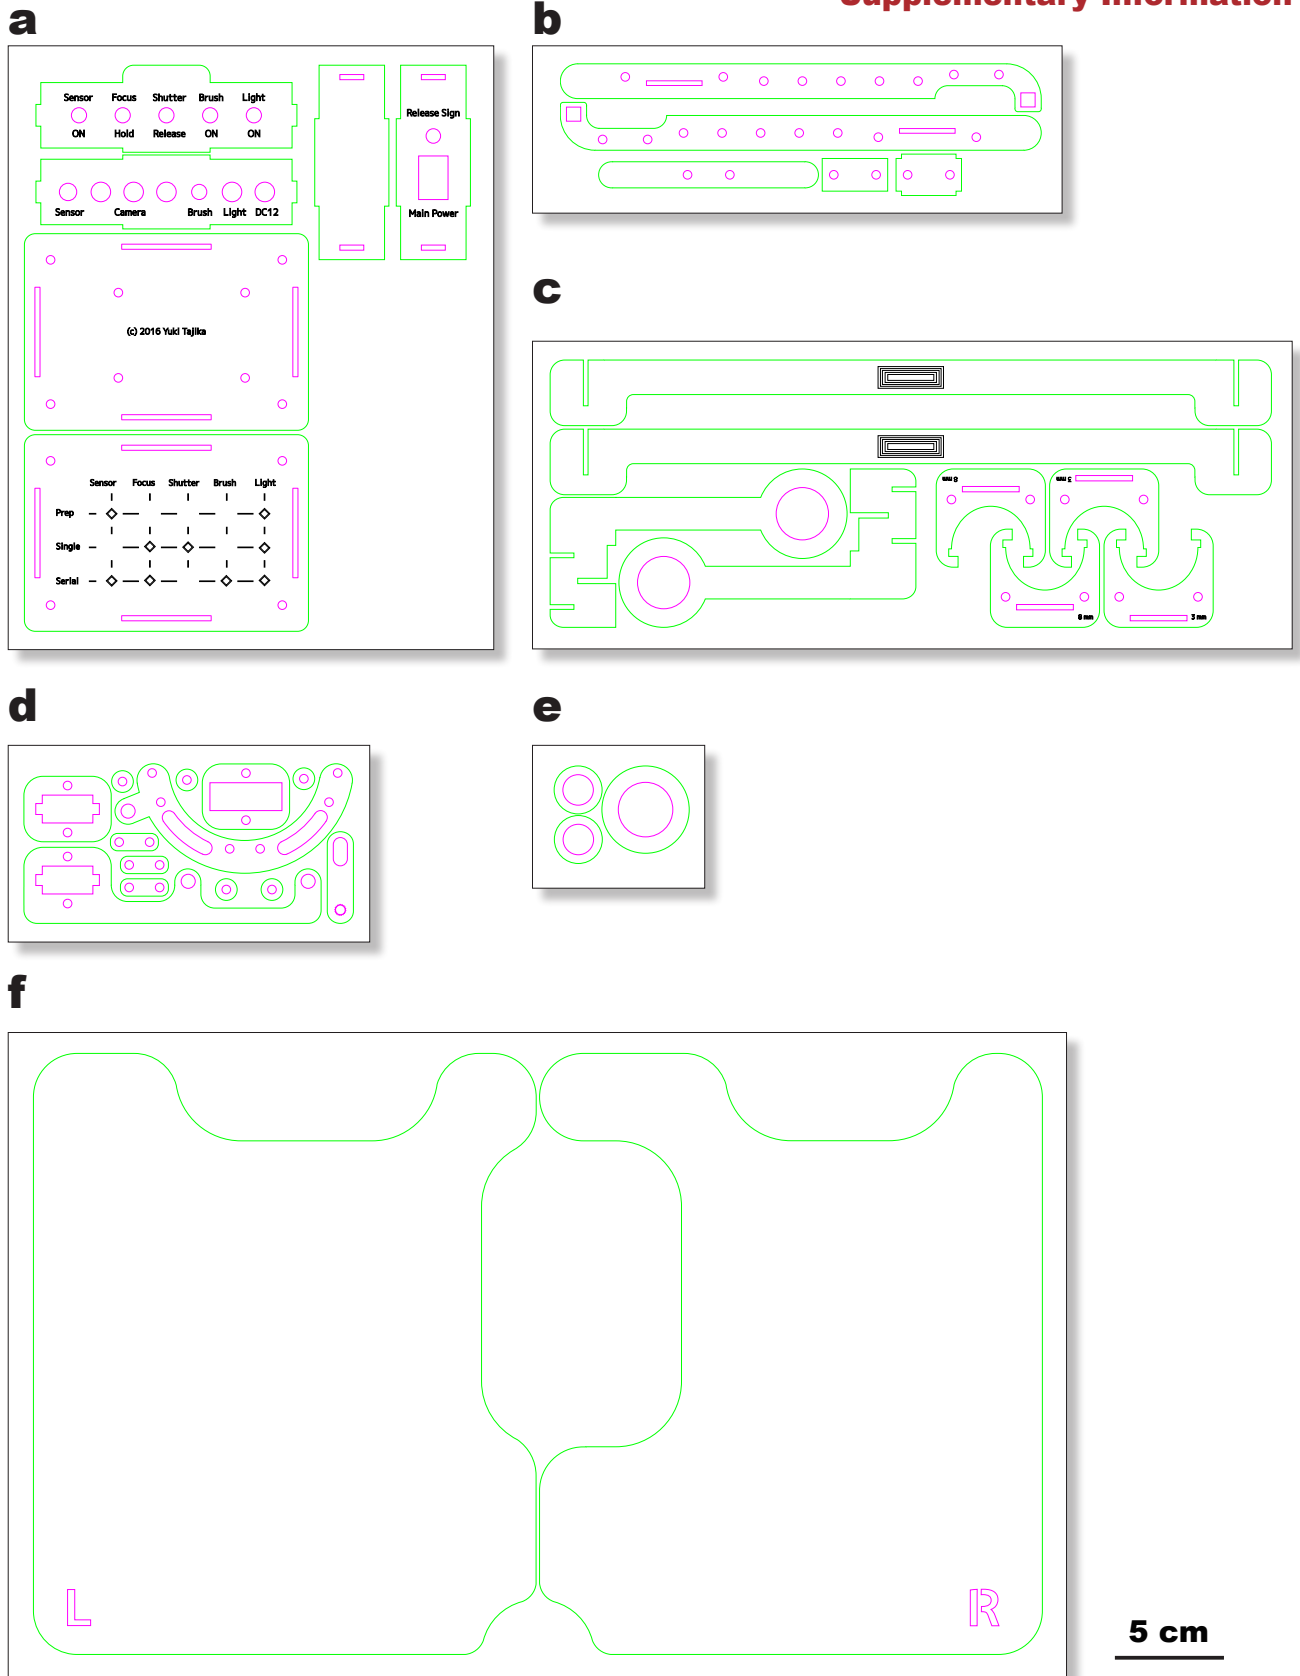

**Supplementary Figure S6** | Drawings for self-made devices. The acrylic plates 2 mm thick were processed by a laser cutting machine to produce the enclosure of the controller (a), frames of the sensor (b), illumination (c), cleaning brush (d), and cover (e). A chloroprene sponge sheet 1 mm thick was processed to make the rubber rings (f). Lines indicate scratching pattern (black), first cutting lines (magenta), and second cutting lines (green). Drawings were saved as SVG files with a resolution of 90 dpi.



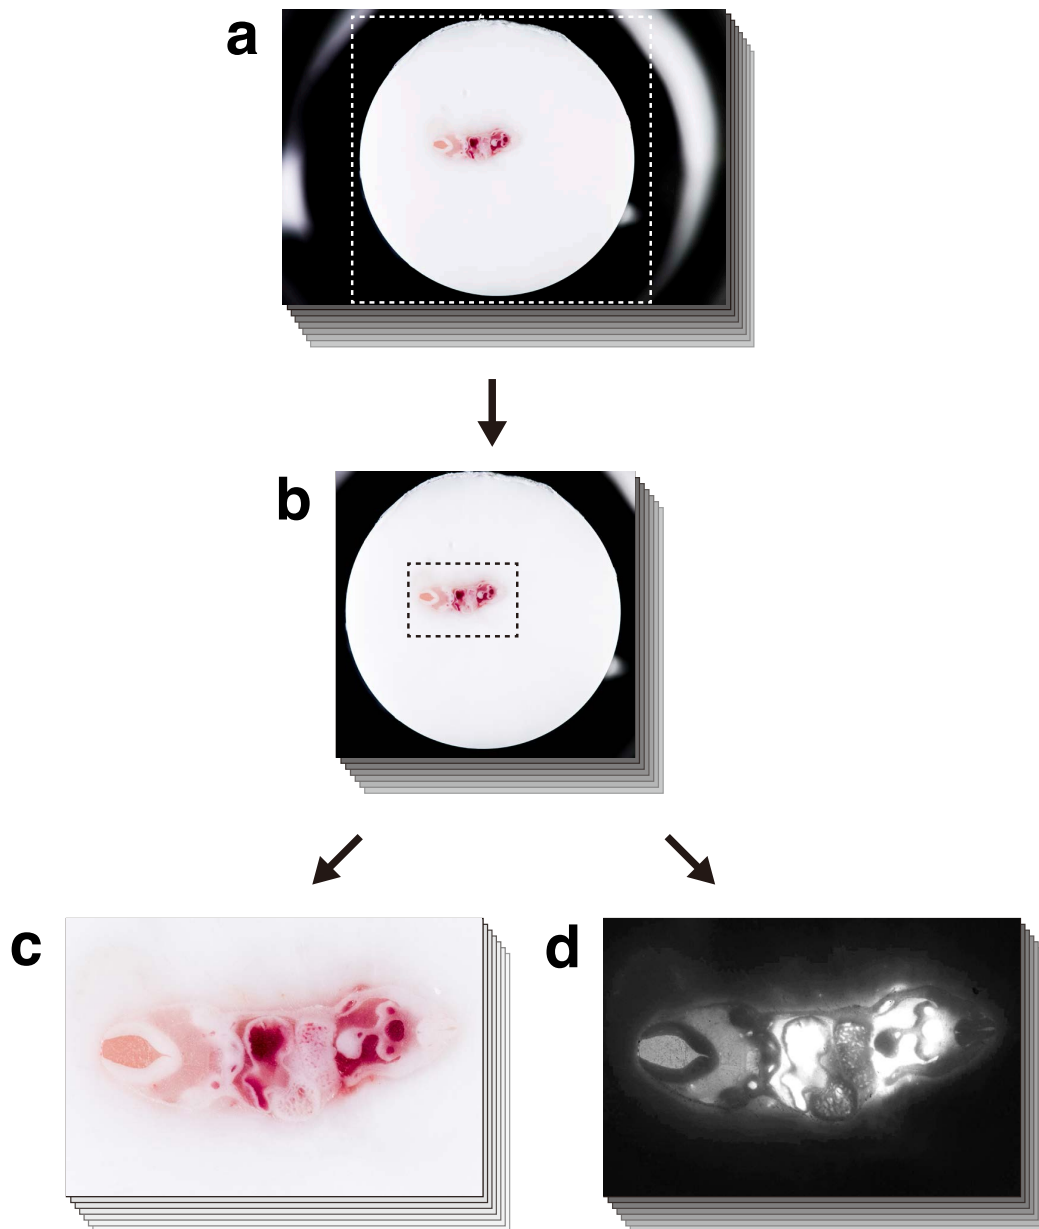

**Supplementary Figure S7** | Procedure for image processing. a: Block-face images in RAW format are converted to JPEG images and cropped (boxed area). The outer circumference of the block is necessary for subsequent image registration. b: Images are registered, then cropped again (boxed area) to create a derivative image series. c, d: Color and grayscale image series are created. These series are converted to DICOM images and used for MPR and VR, respectively.

### Supplementary Note | Codes for releasing the shutter (left) and regulating the cleaning brush (right)

```

//*****
// Designed for the sensor device, a part of the CoMBI system.
// ATtiny85 syncs cryostat handle and shutter release,
// using a photoreflector (Rohm RPR-220) and an optocoupler (Toshiba TLP785GB).
// Upload the code with the internal clock 1 MHz.
//*****

const int ledPin = 1;      //connect LED to 1
const int shutterPin = 0;  //connect an optocoupler to 0
const int sensorPin = A2;  //connect the sensor signal to A2
int sensorVal = 0;

void setup() {
  pinMode(ledPin, OUTPUT);
  pinMode(shutterPin, OUTPUT);
  digitalWrite(ledPin, HIGH);    // Twinkle LED to sign turning on
  delay(200);
  digitalWrite(ledPin, LOW);
  delay(200);
  digitalWrite(ledPin, HIGH);
  delay(200);
  digitalWrite(ledPin, LOW);
}

void loop() {
  sensorVal = analogRead(sensorPin);
  delay(2);

  if (sensorVal > 250){          // If the sensor detect the light absorbing sheet
    digitalWrite(shutterPin, HIGH); // Release shutter
    delay(10);
    digitalWrite(shutterPin, LOW);
    digitalWrite(ledPin, HIGH); // Indicate the sheet position and shutter release by LED
    delay(2000);
    digitalWrite(ledPin, LOW);
  }

  else{
    digitalWrite(ledPin, LOW);
    digitalWrite(shutterPin, LOW);
  }
}

```

```

//*****
// Designed for the cleaning device, a part of the CoMBI system.
// ATtiny85 controls a Micro Servo SG92R.
//
//
// Download and Install "SoftwareServo.h" into the Arduino Software.
// Modify the SoftwareServo.h file to use <Arduino.h> instead of <WProgram.h>.
// Upload the code with the internal clock 1 MHz.
//
// (In case of Arduino/Genuino Uno, use "Servo.h".)
//*****

#include <SoftwareServo.h>

SoftwareServo myservo; // create servo object

void setup()
{
  myservo.attach(0); // attach the servo on pin 0 to the servo object
}

void loop()
{
  myservo.write(5);      // sets the servo position 5
  delay(300);           // waits for the servo to get there
  SoftwareServo::refresh(); // recommended

  myservo.write(55);    // sets the servo position 55
  delay(300);
  SoftwareServo::refresh();

}

```
